# Supplementary material for: Non-contact hemodynamic imaging reveals the jugular venous pulse waveform
Source: PubMed Central journal article supplement (PMC5220303; doi:10.1038/srep40150), 2017-01-09
Supplement: srep40150-s1.pdf [file srep40150-s1.pdf]

**Supplementary Information for**  
**Non-contact hemodynamic imaging reveals the jugular venous pulse waveform**  
**Robert Amelard, Richard L Hughson, Danielle K Greaves, Kaylen J Pfisterer, Jason Leung, David A**  
**Clausi, Alexander Wong**

**Supplementary Video 1:** Slow motion video showing the detected arterial (red) and venous (blue) pulsations through the neck in a typical participant. The two pulses occur alternately out of phase, consistent with ultrasound findings. The relative locations of the two pulses were consistent with the ultrasound findings of the carotid artery and jugular vein.

**Supplementary Dataset 1:** Dataset used to generate the results of the paper. The waveforms for each participant that were used in the results of the study are provided.
